## Repeat Positive Cultures in *Mycobacterium intracellulare* Lung Disease after Macrolide Therapy Represent New Infections in Patients with Nodular Bronchiectasis

Richard J. Wallace, Jr.,<sup>1</sup> Yansheng Zhang,<sup>1</sup>  
Barbara A. Brown-Elliott,<sup>1</sup> Mitchell A. Yakrus,<sup>5</sup>  
Rebecca W. Wilson,<sup>1,3</sup> Linda Mann,<sup>1</sup> Leslie Couch,<sup>2</sup>  
William M. Girard,<sup>2</sup> and David E. Griffith<sup>2,4</sup>

Departments of <sup>1</sup>Microbiology, <sup>2</sup>Specialty Care Services,  
and <sup>3</sup>Pathology, and <sup>4</sup>Center for Pulmonary Infectious Disease  
Control, University of Texas Health Center at Tyler; <sup>5</sup>National Center  
for Infectious Diseases, Centers for Disease Control  
and Prevention, Atlanta, Georgia

The genomic DNA patterns (genotypes) of 55 episodes of late positive sputum isolates, collected after  $\geq 4$  consecutive months of negative sputum cultures, in prospective macrolide treatment trials of *Mycobacterium avium* complex (MAC) lung disease were assessed by pulsed-field gel electrophoresis (PFGE). Having  $\geq 2$  cultures positive for MAC after completion of therapy was documented 23 times; of 20 episodes studied by PFGE, 17 (85%) represented new genotypes (i.e., new infections), and 87% occurred in patients with nodular bronchiectasis. With  $\geq 2$  positive cultures after therapy was stopped prematurely, 6 (86%) of 7 episodes were relapses. Single positive cultures after completion of therapy occurred 16 times; only 1 (6%) was predictive of a subsequent relapse. No late isolates were macrolide resistant. Thus, relapses of MAC lung disease with these macrolide regimens are unusual, and most infections after completing therapy resulted from new strains in patients with nodular bronchiectasis.

Treatment of *Mycobacterium avium* complex (MAC) lung disease has always been problematic. The introduction of the newer macrolides has improved the outlook for most patients, but many questions remain. These questions include the duration of drug therapy, the need for daily (vs. 3 times weekly) therapy, the number and choice of companion drugs, and what relapse rates can be expected with long-term (e.g., 5-year) follow-up. Single positive sputum cultures due to MAC that are not indicative of disease have long been recognized and presumably reflect transient infection from the environment or contamination. Because MAC are common in the environment, repeat or multiple infections are a risk in patients who have been treated successfully. Indeed, a recent study suggested that the average patient with nodular bronchiectasis is infected with 2 or 3 genotypes (i.e., isolates with different genomic large re-

striction-fragment patterns separated by pulsed-field gel electrophoresis [PFGE]) [1].

We have been involved in prospective macrolide treatment trials since 1992. As part of the evaluation of the success of therapy, we have performed genomic DNA strain comparisons of initial and subsequent late positive isolates after sputum conversion for all patients entered into the treatment trials. This study presents the interim results of these comparisons.

### Patients, Materials, and Methods

**Patient population.** Patients with MAC lung disease were either diagnosed at the University of Texas Health Center (Tyler) or referred there because of the Center's expertise with therapy of that disease. They were then enrolled in 1 of 5 sequential MAC treatment trials. Patients with known or suspected HIV disease were excluded. Disease diagnosis was based on the diagnostic criteria of the American Thoracic Society [2]. Three pretreatment sputum cultures were obtained, and then cultures were obtained once a month while patients were receiving therapy. When patients were not receiving therapy, cultures were obtained monthly for the first 6 months, then every 3–6 months. Patients' chest radiographs and computerized axial tomography scans were reviewed, and each patient's disease was categorized as either nodular bronchiectasis or upper lobe fibrocavitary disease [1, 3, 4]. Patients were included in the treatment trials only if their pretreatment MAC isolate was macrolide susceptible. Sputum cultures were summarized every 1–2 months for each patient, and the results were screened for late positive cultures. The case summaries were reviewed for all patients as to the timing of cultures relative to their therapy. A single study coordinator monitored all patients in the studies since they began in 1992. Details of these treatment trials and preliminary results

Received 19 November 2001; revised 13 February 2002; electronically published 25 June 2002.

Presented in part: 100th annual meeting of the American Society for Microbiology, Atlanta, 17–21 May 1998 (abstract U-61).

Informed consent was obtained from the patients or their parents or guardians, and human experimentation guidelines of the US Department of Health and Human Services and those of the authors' institutions were followed in the conduct of the clinical research. The study protocol was approved by the Human Subjects Institutional Review Board of the University of Texas Health Center at Tyler.

Financial support: Abbott Laboratories; Pfizer Laboratories; Pharmacia-Upjohn.

Reprints or correspondence: Dr. Richard J. Wallace, Jr., University of Texas Health Center at Tyler, Dept. of Microbiology, 11937 US Hwy. 271, Tyler, TX 75708 (richard.wallace@uthct.edu).

The Journal of Infectious Diseases 2002;186:266–73

© 2002 by the Infectious Diseases Society of America. All rights reserved.  
0022-1899/2002/18602-0017\$15.00

are presented elsewhere [5–9]. Therapy included clarithromycin or azithromycin, rifampin or rifabutin, and ethambutol to be taken daily or 3 times weekly, until the patient was culture negative, while receiving therapy for 12 months. A few patients who were treated and monitored in the same manner but who did not enroll in the trials were included.

**Cultures.** Before the initiation of therapy or during the first few months of therapy, multiple cultures were obtained for MAC. Details of the sputum processing are presented elsewhere [1, 5, 6]. In brief, specimens were decontaminated with *N*-acetylcysteine and 2% sodium hydroxide and then plated on Middlebrook 7H10 agar and into a broth medium. Initially, we used a BACTEC 12B bottle (Becton-Dickinson) but later switched to the ESP system (Trek Diagnostics). For positive cultures, a cotton swab sweep of either the solid media or a subculture of the broth medium was added to trypticase soy broth with 15% glycerol and frozen at  $-70^{\circ}\text{C}$  until needed. Most single-positive late cultures were taken from the broth medium bottles, which were saved for 24 months to be sure they were not needed. In early trials, cultures were considered to be positive only if the organism grew on solid medium (i.e., one culture growing in the broth medium while the patient was receiving therapy was not considered to be significant, and therapy was not altered). Subsequently, growth in either medium was interpreted as significant.

**PFGE.** Each patient's cultures were subjected to genomic DNA comparisons (while the patient was receiving therapy) if the patient's sputum converted to negative for a minimum of 4 months and the patient later had a single positive culture or, if the patient had any positive or early discontinuation cultures after the completion of therapy, as long as the patient was culture negative for at least 6 months during therapy. All available cultures were subjected to study by PFGE.

Patterns of large restriction fragments of genomic DNA were obtained by PFGE, as described elsewhere [10, 11]. In brief, organisms were incorporated into low-melting-point agarose plugs, then lysed with lysozyme (1 mg/mL), sodium dodecyl sulfate (1%), and proteinase K (1 mg/mL). DNA was digested with *Dra*I and *Xba*I and separated with a CHEF Mapper system (Bio-Rad Laboratories) at  $14^{\circ}\text{C}$  for 20 h at 6 V/cm. Pulse time was ramped from 3 to 12 s after *Xba*I digestion, from 5 to 15 s for 14 h, and then from 60 to 70 s for 6 h after *Dra*I digestion. Gels were photographed after staining with ethidium bromide.

Strains were compared for relatedness using the method of Tenover et al. [12], with minor modification specifically for MAC based on in-house experience with this method. Isolates were considered to be the same ("indistinguishable") if they showed no fragment differences with either restriction enzyme, closely related if they differed by 2–3 bands (i.e., restriction fragments) with either or

**Table 1.** Group 1 patients: consecutive negative cultures for  $\geq 10$  months during therapy, followed by recurrences of multiple positive cultures after completion of therapy.

| Macrolide regimen, patient | Age, years | Months culture negative |                         | Pre/post strains studied | No. of late positive cultures | Results of PFGE      | Results of MEE | Other potential pathogens recovered                                 |
|----------------------------|------------|-------------------------|-------------------------|--------------------------|-------------------------------|----------------------|----------------|---------------------------------------------------------------------|
|                            |            | Receiving treatment     | Not receiving treatment |                          |                               |                      |                |                                                                     |
| Azithromycin               |            |                         |                         |                          |                               |                      |                |                                                                     |
| 1 <sup>a</sup>             | 86         | 11                      | 1                       | 3/2                      | 4                             | New strain           | New            | None                                                                |
| 2 <sup>a</sup>             | 86         | 11                      | 8                       | 3/2                      | 2                             | Relapse              | ND             | None                                                                |
| 3                          | 66         | 12                      | 9                       | 2/2                      | 2                             | New strain           | New            | <i>P. aeruginosa</i>                                                |
| 4                          | 52         | 12                      | 10                      | 1/11                     | 18                            | New strain           | New            | <i>P. aeruginosa</i> and <i>M. kansasii</i>                         |
| 5                          | 62         | 13                      | 14                      | 9/4                      | 6                             | New strain           | New            | None                                                                |
| 6                          | 74         | 13                      | 20                      | 10/4                     | 5                             | New strain           | New            | <i>M. kansasii</i> , <i>P. aeruginosa</i> , and <i>M. abscessus</i> |
| 7                          | 67         | 12                      | 32                      | 3/2                      | 3                             | New strain           | New            | None                                                                |
| 8                          | 54         | 12                      | 36                      | 1/2                      | 2                             | New strain           | New            | None                                                                |
| 9                          | 33         | 12                      | 40                      | 3/4                      | 4                             | New strains          | ND             | <i>P. aeruginosa</i> and <i>M. abscessus</i>                        |
| Clarithromycin             |            |                         |                         |                          |                               |                      |                |                                                                     |
| 10                         | 54         | 12                      | 2                       | 10/3                     | 5                             | New strain           | New            | <i>M. abscessus</i> and <i>P. aeruginosa</i>                        |
| 11                         | 86         | 12                      | 3                       | 1/2                      | 2                             | New strain           | New            | <i>S. maltophilia</i>                                               |
| 12                         | 69         | 16                      | 3                       | 0/0                      | 3                             | No PFGE <sup>b</sup> | ND             | None                                                                |
| 13                         | 69         | 12                      | 3.5                     | 5/2                      | 2                             | Relapse              | Relapse        | None                                                                |
| 14 <sup>b</sup>            | 68         | 12                      | 5                       | 3/2                      | 2                             | Possibly related     | Relapse        | <i>M. abscessus</i> and <i>P. aeruginosa</i>                        |
| 15                         | 64         | 13                      | 10                      | 4/2                      | 2                             | New strains          | ND             | <i>P. aeruginosa</i>                                                |
| 16                         | 73         | 12.5                    | 15.5                    | 2/5                      | 8                             | New strain           | New            | None                                                                |
| 17 <sup>b</sup>            | 68         | 12                      | 21                      | 3/5                      | 5                             | New strains          | ND             | <i>M. abscessus</i> and <i>P. aeruginosa</i>                        |
| 18                         | 57         | 12                      | 26                      | 0/0                      | 2                             | No PFGE <sup>b</sup> | ND             | Unknown                                                             |
| 19                         | 45         | 12                      | 29                      | 1/2                      | 2                             | New strain           | Relapse        | <i>Klebsiella</i> species                                           |
| 20                         | 61         | 12                      | 31                      | 0/5                      | 7                             | No PFGE <sup>b</sup> | ND             | <i>P. aeruginosa</i> and <i>M. abscessus</i>                        |
| 21                         | 54         | 12.5                    | 39                      | 2/2                      | 3                             | New strain           | New            | None                                                                |
| 22                         | 63         | 12.5                    | 48                      | 3/4                      | 4                             | New strain           | ND             | <i>M. fortuitum</i>                                                 |
| 23                         | 65         | 12.5                    | 56                      | 4/3                      | 6                             | New strain           | ND             | <i>P. aeruginosa</i>                                                |
| Total                      |            | 283                     | 462                     | 73/70                    | 99                            |                      |                | 13/22                                                               |
| Mean                       | 63.9       | 12.3                    | 20.0                    |                          | 4.3                           |                      |                |                                                                     |

NOTE. MEE, multilocus enzyme electrophoresis; *M. abscessus*, *Mycobacterium abscessus*; *M. fortuitum*, *Mycobacterium fortuitum*; *M. kansasii*, *Mycobacterium kansasii*; ND, not determined; *P. aeruginosa*, *Pseudomonas aeruginosa*; PFGE, pulsed-field gel electrophoresis; pre, pretreatment or early therapy; post, late positive after therapy; *S. maltophilia*, *Stenotrophomonas maltophilia*.

<sup>a</sup> Same patient.

<sup>b</sup> Pretreatment isolate(s) not available for study.

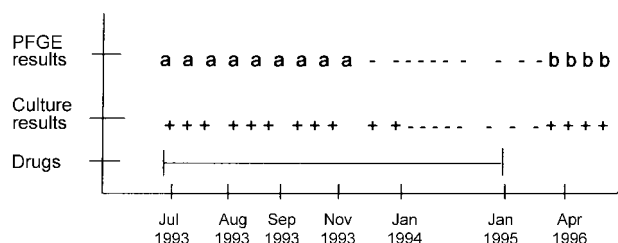

**Figure 1.** Culture and pulsed-field gel electrophoresis (PFGE) results over time in a patient with nodular bronchiectasis and repeat infection due to *Mycobacterium avium* complex (MAC) after initial successful drug therapy. The pattern of the first genotype is labeled “a,” whereas the pattern of the second genotype is labeled “b.” “Drugs” refers to MAC drug treatment. +, Positive culture; –, negative culture.

both enzymes, possibly related if they differed by 4–6 bands but >50% of well-resolved bands were the same with either or both enzyme, and different or unrelated strains if  $\geq 7$  bands were different and <50% of well-resolved bands were the same with both enzymes. Relapse strains were those strains classified as indistinguishable from or closely related to pretreatment isolates, whereas new strains were strains classified as different or unrelated to the pretreatment strains. Possibly related strains were classified as possibly related.

**Multilocus enzyme electrophoresis (MEE).** Examples of each PFGE genotype from most patients who became infected with a new genotype after therapy were also subjected to MEE. Ten enzymes known to have multiple alleles for MAC were studied as described elsewhere [13]. Enzymes included 6-phosphogluconate dehydrogenase (NADP coenzyme), malate dehydrogenase, leucine aminopeptidase, benzyl alcohol dehydrogenase, esterase, phosphoglucose isomerase, phosphoglucomutase, glutamate oxalacetic transaminase, adenylate kinase, and 6-phosphogluconate dehydrogenase (NAD coenzyme). By MEE, isolates were considered to be the same (“indistinguishable”) if they had the same allelic pattern, possibly related if they differed by 1 closely related pattern, and different or unrelated if they differed by  $\geq 2$  or more alleles or 1 very different allelic pattern.

**Species identification.** Initial and late positive cultures were confirmed as MAC by using the commercial DNA-RNA probe (Accuprobe; Gen-Probe). They then were identified as *M. avium* or *M. intracellulare*, by either the species-specific DNA-RNA probe (Accuprobe) or polymerase chain reaction (PCR) restriction analysis of the 439-bp [14] fragment of the 65 kDa *hsp* gene, as described elsewhere [14]. One isolate of each PFGE pattern was studied.

**Susceptibility testing.** Initial and selected late positive cultures were tested for susceptibility to clarithromycin using a broth microdilution system according to recently proposed NCCLS (formerly the National Committee for Clinical Laboratory Standards) guidelines [15]. Resistance was defined as an MIC of  $\geq 32$   $\mu\text{g/mL}$ , whereas susceptibility was defined as an MIC of  $\leq 16$   $\mu\text{g/mL}$ . Details of the method are provided elsewhere [5, 16].

## Results

**Patients and cultures.** In total, 333 patients were enrolled (intent-to-treat) in the 5 macrolide treatment trials; 204 patients

(61%) were enrolled to receive clarithromycin regimens, and 129 (39%) were enrolled to receive azithromycin regimens. All but 2 patients are currently not receiving study drugs or have completed therapy, but only ~20% have been not been receiving therapy for 5 years. Thus far, 51 patients have had 55 episodes of  $\geq 1$  late positive culture for MAC. A total of 296 cultures from these patients was submitted for study by PFGE, a mean of 5.4 cultures per patient episode.

Patients were divided into 4 groups. Group 1 patients had consecutive negative cultures (in both the liquid and solid medium) for  $\geq 10$  months during therapy and multiple ( $\geq 2$ ) positive cultures after completion of drug therapy. (The late positive cultures were collected within 6 months of each other.) Group 2 patients had consecutive negative cultures for  $\geq 6$  to <10 months during therapy and multiple ( $\geq 2$ ) positive cultures collected within a 6-month period after premature discontinuation of drug therapy; patients who were culture negative for <6 months before discontinuing therapy were not evaluated. Group 3 patients had a single positive culture while receiving drug treatment, after having negative sputum cultures for at least 4 consecutive months and no other positive cultures in the ensuing 3 months. Group 4 patients had consecutive negative cultures for  $\geq 10$  months during therapy and a single positive culture after satisfactory completion of drug therapy, with no other positive cultures in the next 6 months after the single positive culture.

**PFGE.** All isolates gave satisfactory large restriction-fragment patterns for analysis. Group 1 isolates caused 23 episodes in 21 patients (detailed in table 1). The mean number of follow-up cultures (not during therapy) for the 22 episodes with detailed follow-up was 21.5 (range, 2–65 cultures). Eighteen (82%) of these 22 episodes were in patients with  $\geq 10$  follow-up cultures. Nine patients (39%) had 2 positive cultures, 3 patients (13%) had 3 positive cultures, and 11 patients (48%) had  $\geq 4$  positive cultures.

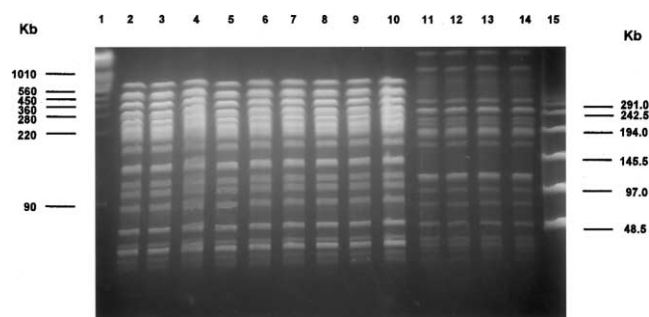

**Figure 2.** *DraI* large restriction-fragment patterns of genomic DNA of *Mycobacterium avium* complex (MAC) isolates from a patient with nodular bronchiectasis and second MAC infection shown in figure 1. Lane 1, yeast DNA standards; lanes 2–10, identical patterns from 9 isolates collected pretreatment or during initial therapy between July and November 1993; lanes 11–14, identical patterns but different from early ones from 4 isolates collected between April and June 1996; lane 15, lambda DNA standards.

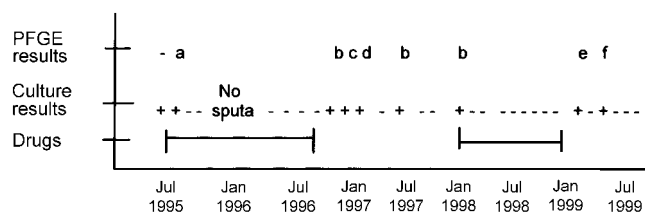

**Figure 3.** Culture and pulsed-field gel electrophoresis (PFGE) results over a 4-year period in a 65-year-old male with nodular bronchiectasis. Each letter (a–f) represents a different PFGE type. “Drugs” refers to *Mycobacterium avium* complex drug treatment. +, Positive culture; –, negative culture.

Of the 23 episodes, 20 had PFGE comparison of both pretreatment isolates (mean, 3.7 isolates) and posttreatment isolates (mean, 3.0 isolates). Of these 20 isolates, 17 (85%) involved  $\geq 1$  new strain, 1 (5%) involved a possibly related strain, and 2 (10%) involved relapse strains. For the remaining 3 episodes, no pretreatment isolate was available for comparison.

The mean time to infection in the 14 episodes of new infections in patients with nodular bronchiectasis was 24.2 months. One patient had 2 separate episodes with different strains 5 and 21 months after stopping therapy, and another had 2 episodes 1 and 8 months after therapy. Overall, of the 23 episodes of multiple positive cultures after completion of an acceptable course of therapy, only 1 (4.3%) was shown to be a definite relapse. Examples of the time course, culture results, and PFGE in 2 patients with late reinfection is shown in figures 1–4.

Twenty (87%) of the 23 episodes occurred in patients with underlying nodular bronchiectasis, including both patients with 2 separate episodes. Of the 18 patients with nodular bronchiectatic lung disease, 14 (78%) were women, none was a current smoker, 10 (55%) had never smoked, and none abused alcohol. In contrast, of the 3 patients with upper lobe cavitory disease, all 3 were men, 2 were current smokers, all had smoked  $>50$  pack-years, and 2 abused alcohol. These findings are considered to be typical of these 2 patient populations with MAC [1].

Group 2 isolates were from 7 patients who had stopped drug therapy but had stopped prematurely, such that they were culture negative for  $\geq 6$  but  $<10$  months during therapy (table 2). PFGE was performed on isolates from all patients. Of these 7 patients with multiple positive cultures, 6 (86%) had relapses with the same genotype (figure 5).

Group 3 consisted of 8 isolates from 8 patients who had single positive cultures after sputum conversion of at least 4 consecutive months, but while still receiving therapy, and 2 isolates (4 months apart) from a ninth patient (table 3). These were the only positive results the patients had after sputum conversion during therapy. All 10 cultures were acid-fast bacilli (AFB) smear negative. Five (50%) were positive only in the broth culture medium, and 4 (40%) were positive in the liquid medium with  $<20$  colonies on Middlebrook 7H10 agar (table 3). PFGE was performed on 9 of 10 of the cultures. In 5 patients, the single positive culture was the same as the pretreat-

ment strain (genotype), and all 4 patients (100%) in whom this single positive culture was disregarded and received a standard course of therapy (culture negative for 10–12 months, except for the 1 positive broth culture) experienced relapse within 3 months of stopping therapy. Four single positive isolates from 3 patients had a different pattern (different from the pretreatment PFGE type), and none of the 3 patients experienced relapse or had additional positives. The last patient who had a single positive culture at 6 months but whose isolate was not saved and who was culture negative only 8 months (the single positive was disregarded), experienced relapse within 3 months of stopping therapy. Of the 9 patients, 7 had underlying nodular bronchiectasis. Thus, overall, 50% of single positives were pretreatment genotypes and were predictive of relapse, whereas 40% of the cultures were new genotypes that had no apparent impact on the outcome of therapy.

Group 4 consisted of isolates from 15 single positive MAC cultures (with no other positive cultures in the ensuing 6 months) from 14 patients who had completed therapy, with  $\geq 10$  months of consecutive negative cultures during therapy. Eleven (79%) of 14 isolates with quantitated cultures were recovered from the broth medium only. Of the 12 isolates studied by PFGE, 7 (58%) of 12 were new isolates, 2 (17%) of 12 were relapse isolates, 2 (17%) of 12 had possible related isolates, and 1 culture was identified as a laboratory contaminant. A second isolate was considered to be a laboratory contaminant but was not saved for PFGE. All but 1 of the 15 single positive cultures were recovered 3 or more months after completion of therapy, and the majority (75%) occurred  $>6$  months after stopping therapy. Thus, single positive cultures were seen in patients after completion of therapy, and in only 1 patient (7%) was it predictive of a later relapse with the same strain. Isolates in Group

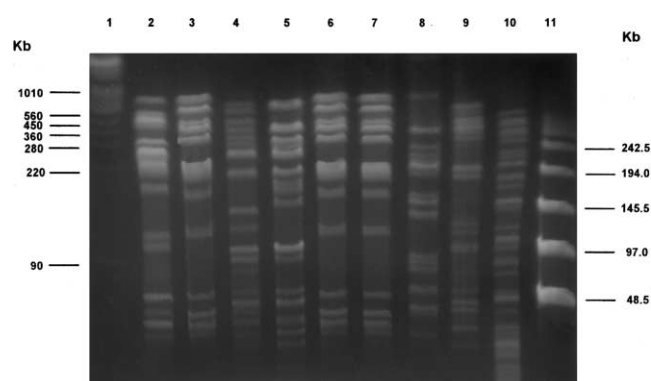

**Figure 4.** *DraI* large restriction-fragment patterns of genomic DNA of *Mycobacterium avium* complex isolates from patient shown in figure 3. Lane 1, yeast DNA standards. Lanes 2–9, pulsed-field gel electrophoresis (PFGE) patterns from isolates collected from August 1995 to July 1999 in chronological order (labeled in figure 3 as a–f). PFGE patterns in lanes 3, 6, and 7 were the same (indistinguishable). All others were different. One additional isolate was obtained after July 1999 (not shown in figure 3) and it exhibited another pattern (pattern g, lane 10). Lane 11, lambda DNA standards.

**Table 2.** Group 2 patients: consecutive negative cultures (including broth) for  $\geq 6$  but  $<10$  months during therapy, followed by multiple positive cultures after stopping therapy prematurely.

| Patient | Months culture negative |                         | Pre/post strains studied | Clarithromycin MIC of late positive culture | Results of PFGE |
|---------|-------------------------|-------------------------|--------------------------|---------------------------------------------|-----------------|
|         | Receiving treatment     | Not receiving treatment |                          |                                             |                 |
| 1       | 9.5                     | 1                       | 2/3                      | S                                           | Relapse         |
| 2       | 6                       | 1                       | 6/2                      | S                                           | Relapse         |
| 3       | 9                       | 2                       | 1/5                      | S                                           | New strains     |
| 4       | 8                       | 2                       | 5/1                      | S                                           | Relapse         |
| 5       | 7                       | 2.5                     | 3/2                      | ND                                          | Relapse         |
| 6       | 9                       | 5.5                     | 6/3                      | S                                           | Relapse         |
| 7       | 9                       | 5.5                     | 1/2                      | S                                           | Relapse         |
| Total   | 57.5                    | 19.5                    | 24/18                    |                                             |                 |
| Mean    | 8.1                     | 2.8                     |                          |                                             |                 |

NOTE. ND, not determined; PFGE, pulsed-field gel electrophoresis; pre, pretreatment or early therapy; post, late positive after therapy; S, susceptible.

4 are summarized in table 4, with comparison of restriction fragment-length polymorphism analysis patterns by PFGE in figure 6.

**MEE.** MEE was performed on 14 of the PFGE types from group 1 patients who had multiple positive cultures after completing recommended therapy. It was in agreement with PFGE with 12 (86%) of 14 of the episodes. It identified the 1 possibly related strain (by PFGE) as the same as the pretreatment strain, and identified a second strain defined as new by PFGE as the same as the pretreatment strain. Technical problems with the gels prevented analysis of the 6 additional paired strains (table 1).

**Species identification.** All PFGE types were confirmed as being MAC by use of the commercial RNA-DNA probe. Identification to species was performed on PFGE types in patients in group 1 with multiple positive cultures after completion of the recommended therapy. A total of 19 pretreatment isolates was studied, of which 18 (95%) were *M. intracellulare*. A total of 27 late positive PFGE types was studied, of which 24 (89%) were *M. intracellulare*. Overall, 91% of the 46 PFGE types were *M. intracellulare*.

**Susceptibility testing.** None of the new infection or relapse isolates was clarithromycin resistant. All pretreatment isolates of the patients with late positive cultures were also clarithromycin susceptible.

## Discussion

Several important observations were apparent from the current study. One of the most important is documentation that reinfection after successful drug therapy occurs with MAC lung disease, but primarily (~90%) in patients with nodular bronchiectasis. This result is perhaps not surprising, since a previous PFGE study [1] showed that most patients with nodular bronchiectasis were infected with multiple genotypes, presumably a result of multiple infections. Reinfection was observed in only 3 patients with cavitary upper lobe disease, and this same pre-

vious PFGE study showed that patients with this form of disease are infected with a single strain [1].

Another observation is that relapse is rare in patients who are culture negative (both broth and solid media) for  $\geq 10$  consecutive months while receiving a 3-drug, macrolide-containing regimen, with 85% of subsequent infections associated with multiple positive sputum cultures in this setting representing a new infection. In contrast, the majority of infections (86%) identified in patients who were culture negative for  $<10$  consecutive months during therapy were relapses, rather than new infections. All the relapse isolates identified to date occurred within 10 months of stopping therapy. Relapse isolates were seen in 4 cultures. Three of these cultures were AFB smear negative, with positive cultures in the broth only, and were not followed by any subsequent positive cultures. The fourth patient was AFB smear positive with  $\geq 4$  heavily positive cultures. Perhaps equally surprising, none of the relapse isolates tested was macrolide resistant. Because the current study includes patients from multiple protocols [5–9], only 20% of patients have been monitored for 5 years after discontinuation of treatment, so some changes in these percentages may occur.

Another important observation was the significance of a single positive culture of the infecting strain during the therapy period after sputum conversion. When this culture (usually a liquid medium bottle only with no growth on the solid media) was ignored, all patients subsequently experienced relapse. One patient who received another 12 months of negative cultures after her single positive has remained negative (not during therapy) for her infecting strain for  $>2$  years. This also points out

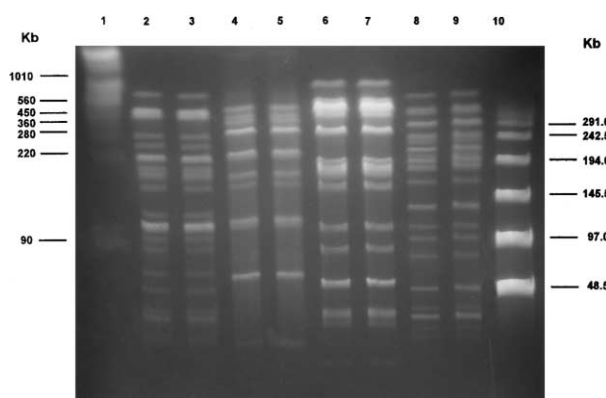

**Figure 5.** *DnaI* large restriction-fragment patterns of genomic DNA of *Mycobacterium avium* complex isolates from patients shown in table 2 who had consecutive negative cultures for  $\geq 6$  but  $<10$  months and then multiple positive cultures after stopping therapy prematurely. Lane 1, yeast DNA standards; lanes 2 and 3, patient 1 (relapse); lanes 4 and 5, patient 5 (relapse); lanes 6 and 7, patient 6 (relapse); lanes 8 and 9, patient 7 (relapse). The first isolate of each patient was from pretreatment or early therapy, and the second one was from a late positive culture obtained after stopping therapy prematurely. The 2 isolates of each patient had identical pulsed-field gel electrophoresis patterns. Lane 10, lambda DNA standards.

**Table 3.** Group 3 patients: consecutive negative cultures for >4 months, followed by a single positive culture, while still receiving therapy.

| Patient        | Months culture negative during therapy | PFGE results | Culture results                             | Outcome                                                                                         | No. of isolates tested by PFGE |
|----------------|----------------------------------------|--------------|---------------------------------------------|-------------------------------------------------------------------------------------------------|--------------------------------|
| 1              | 4                                      | Relapse      | Broth only                                  | Negative for next 6 mos. while receiving Rx; relapsed 1 mo. after Rx discontinued               | 8                              |
| 2              | 5                                      | Relapse      | Broth (11 colonies)                         | Negative for next 7 mos. while receiving Rx; relapsed after Rx discontinued                     | 6                              |
| 3              | 5                                      | Relapse      | Broth only                                  | Negative for next 12 mos. while receiving Rx; has not received Rx for 6 mos., without relapse   | 3                              |
| 4              | 5.5                                    | Relapse      | Broth (1 colony)                            | Negative for next 2.5 mos. while receiving Rx; relapsed after Rx discontinued                   | 8                              |
| 5              | 6                                      | New          | No broth (6 colonies)                       | Remained negative until died while not receiving Rx                                             | 3                              |
| 6 <sup>a</sup> | 6                                      | New          | Broth (1–2 positive cultures grown on agar) | Remained negative; has not received Rx for 2.5 years                                            | 6                              |
| 7              | 6                                      | ND           | Broth (18 colonies)                         | Negative for next 2 mos. while receiving Rx; relapsed 3 mos. after Rx discontinued <sup>b</sup> | 10                             |
| 8              | 7                                      | New          | Broth only                                  | Same as prior processed laboratory culture sample                                               | 4                              |
| 9 <sup>a</sup> | 10                                     | New          | Broth only                                  | Remained negative until Rx discontinued; has not received Rx for 2.5 years                      | 5                              |
| 10             | 10                                     | Relapse      | Broth only                                  | Negative for next 2 mos. while receiving Rx; relapsed 2 weeks after Rx discontinued             | 15                             |
| Total          |                                        |              |                                             |                                                                                                 | 68                             |

NOTE. All the patients in this group had nodular bronchiectasis. Mo, month; ND, not done; PFGE, pulsed-field gel electrophoresis; Rx, treatment.

<sup>a</sup> Same patient.

<sup>b</sup> This patient had poor compliance, with 2 degrees of intolerance.

the importance of using liquid media (broth) in patient follow-up during therapy and the need to do routine cultures after sputum conversion.

An important issue raised by these observations is whether DNA strain comparison is needed to make quality decisions about therapy of MAC lung disease. Treatment of MAC lung disease requires a major investment in time (mean, 16–18 months of therapy), money (the average drug cost alone is >\$7,000 for a course of therapy), and family and health care provider commitment (e.g., ensuring the drugs are taken, avoiding toxicity, and getting to physician appointments). We believe that the availability of methods for strain comparison, such as PFGE, in patients with nodular bronchiectasis is helpful, if not essential. Several methods are available, including PFGE, MEE, arbitrarily primed-PCR, and (for *M. avium*) hybridization of repetitive elements [10, 17–22]. We recommend that

at least 1 pretreatment isolate from all patients with MAC should be saved for at least 3 years from the start of therapy and that this isolate be compared to any subsequent positive cultures that may affect treatment.

In contrast, a single positive culture that was AFB smear negative and of low positivity (<10 colonies on solid media and/or positive in the liquid medium) after successful clinical therapy (with ≥10 months of consecutive negative cultures during therapy) is generally not the same as the original infecting strain (only 15% of current cases), and is not a predictor of relapse. This presumes that subsequent cultures over a 6-month period after the single positive are negative.

Several features of the reinfections are disturbing. One is that they were often polymicrobial (i.e., involved multiple genotypes); 7 (44%) of 16 of those studied were polymicrobial. One would have expected a single strain or genotype to have been

**Table 4.** Group 4 patients: negative cultures for  $\geq 10$  months during therapy, followed by a single positive culture after discontinuing therapy, with no other positive cultures within 6 months after the positive culture.

| Patient    | Months culture negative while not receiving therapy | Culture positive             | PFGE result                          | Nodular bronchiectasis | Outcome (date of last culture)                                                     | No. tested Pre/Post PFGE |
|------------|-----------------------------------------------------|------------------------------|--------------------------------------|------------------------|------------------------------------------------------------------------------------|--------------------------|
| 1          | 1.5                                                 | Broth only                   | New                                  | +                      | Remained culture negative until death                                              | 1/1                      |
| 2          | 3                                                   | $\geq 4$ Grown on agar       | ND (presumed laboratory contaminant) | —                      | Remains culture negative 26 mos. later (Sep 2000)                                  | 0/0                      |
| 3          | 5.5                                                 | Broth only                   | New                                  | +                      | Remained culture negative for 3 yrs.; relapsed with another strain                 | 2/1                      |
| 4          | 6                                                   | Broth only                   | Relapse                              | +                      | Remains culture negative 9 mos. later (Mar 2000)                                   | 1/1                      |
| 5          | 7                                                   | Broth only                   | New                                  | —                      | Remains culture negative 5 yrs. later (Jul 1999)                                   | 5/1                      |
| 6          | 8                                                   | Broth only                   | Possibly related <sup>a</sup>        | +                      | Remains culture negative 15 mos. later (Sep 2001)                                  | 1/1                      |
| 7          | 10                                                  | Broth only                   | Relapse                              | +                      | Remains culture negative 25 mos. later (Aug 2001)                                  | 1/1                      |
| 8          | 13                                                  | Broth only                   | New                                  | +                      | Remains culture negative 4 yrs. later (Feb 2001)                                   | 1/1                      |
| 9          | 14.5                                                | Unknown (outside laboratory) | ND (no pre-Rx isolate)               | +                      | Had multiple positive cultures, same as the single positive culture, 16 mos. later | 0/5                      |
| 10         | 16                                                  | Broth only                   | ND (lost)                            | +                      | Remains culture negative 32 mos. later (Feb 2001)                                  | 0/0                      |
| 11         | 19                                                  | Broth only                   | Possibly related <sup>b</sup>        | +                      | Remains culture negative 19 mos. later (Oct 2001)                                  | 1/1                      |
| 12         | 23                                                  | Broth only                   | New                                  | —                      | Remains culture negative 3.5 yrs. later (Jul 1999)                                 | 2/1                      |
| 13         | 25                                                  | Broth only                   | New                                  | —                      | Remains culture negative 3.5 yrs. later (Jul 1999)                                 | 5/1                      |
| 14         | 30                                                  | Broth (6 colonies)           | New                                  | +                      | Remained culture negative until death                                              | 3/1                      |
| 15         | 34                                                  | Broth (1 colony)             | Laboratory contaminant               | +                      | Remains culture negative 3.3 yrs. later (Oct 1999)                                 | 3/1                      |
| Total Mean | 15.1                                                |                              |                                      |                        |                                                                                    | 26/17                    |

NOTE. All acid-fast bacilli smears were negative for this group of patients. Mos., months; ND, not done; post, late positive culture after therapy; pre, pretreatment or early therapy; Rx, treatment; yrs., years; +, positive; —, negative.

<sup>a</sup> Six bands' difference with *Xba*I, and 5 bands' difference with *Dra*I.

<sup>b</sup> Five bands' difference from each enzyme.

identified. In 2 patients, however, 2 distinct episodes involving different strains were identified (table 1). Did multiple genotypes infect the patient at the same time, or was the timing of cultures such that  $\geq 1$  infection episode was missed? The observation that many episodes of positive cultures may be followed by periods of negative cultures suggests that the latter possibility is more likely.

The second surprising feature is how close the new infections in patients with nodular bronchiectasis occurred after stopping therapy, with a mean of only 24 months. This might support the concept that they were present all along in the patient, but just not active. Yet, true relapses of the identified original strains or genotypes were rare and all occurred within the first year after stopping therapy. It is most likely, in our opinion, that MAC infection is not the primary disease in patients with nodular bronchiectasis. The patients' immune-compromising disease that puts them at risk for MAC (i.e., the bronchiectasis) is unaltered by therapy, and continued environmental exposure

may make reinfections only a matter of time for most patients with nodular bronchiectasis. The short time to reinfection could be a partial function of the length of follow-up, as only 20% of patients in these 5 treatment trials have been monitored (not during therapy) for at least 5 years. We suspect that reinfections in patients with nodular bronchiectasis will continue to be seen and will not just be clustered close to the time that therapy was stopped. Longer follow-up appears to be most important for patients with upper lobe fibrocavitary disease, where relapses occurred a mean of 4 years after stopping therapy. Infections due to MAC are a well recognized complication of prior granulomatous disease, especially following tuberculosis (so called "post-tuberculous infections"), but generally occur many years after the primary infection. It seems likely that more reinfections of this type will be seen, but may require many years more follow-up.

The other potential pathogens seen in these patients, primarily *Pseudomonas aeruginosa* and *Mycobacterium abscessus*,

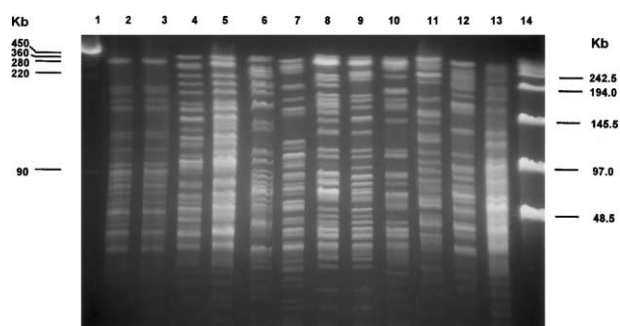

**Figure 6.** *Xba*I large restriction-fragment patterns of genomic DNA of *Mycobacterium avium* complex isolates from selected patients shown in table 4 who had negative cultures for  $\geq 10$  months during therapy and then had single positive cultures while not receiving therapy. Lane 1, yeast DNA standards; lanes 2 and 3, patient 4 (relapse); lanes 4 and 5, patient 6 (possibly related); lanes 6 and 7, patient 8 (new); lanes 8 and 9, patient 11 (possibly related); lanes 10 and 11, patient 12 (new); lanes 12 and 13, patient 14 (new). The first isolate of each patient was from pretreatment or early therapy, and the second one was from a late positive culture after negative cultures for  $\geq 10$  months during therapy. Lane 14, lambda DNA standards.

bear a striking resemblance to the microbial flora seen in some patients with cystic fibrosis (CF). No genetic defect has been described in these patients with nodular bronchiectasis as it has in patients with CF, but it is a strong possibility. The most logical common denominator showed by the 2 groups would seem to be their bronchiectasis, but more studies are needed to help address this issue.

#### Acknowledgments

We would like to acknowledge the support of the clinical mycobacteriology laboratory of the University of Texas Health Center (Tyler) and Joanne Woodring, for her help in preparation of the manuscript.

#### References

- Wallace RJ Jr, Zhang Y, Brown BA, et al. Polyclonal *Mycobacterium avium* complex infections in patients with nodular bronchiectasis. *Am J Respir Crit Care Med* **1998**;158:1235–44.
- Diagnosis and treatment of disease caused by nontuberculous mycobacteria: official statement of the American Thoracic Society. *Am J Respir Crit Care Med* **1997**;156:(Suppl 2 Pt 2):1–25.
- Reich JM, Johnson RE. *Mycobacterium avium* complex pulmonary disease presenting as an isolated lingular or middle lobe pattern: the Lady Windermere syndrome. *Chest* **1992**;101:1605–9.
- Swensen SJ, Hartman TE, Williams DE. Computed tomographic diagnosis of *Mycobacterium avium*–*intracellulare* complex in patients with bronchiectasis. *Chest* **1994**;105:49–52.
- Wallace RJ Jr, Brown BA, Griffith DE, et al. Initial clarithromycin monotherapy for *Mycobacterium avium*–*intracellulare* complex lung disease. *Am J Respir Crit Care Med* **1994**;149:1335–41.
- Wallace RJ Jr, Brown BA, Griffith DE, Girard WM, Murphy DT. Clarithromycin regimens for pulmonary *Mycobacterium avium* complex: the first 50 patients. *Am J Respir Crit Care Med* **1996**;153:1766–72.
- Griffith DE, Brown BA, Girard WM, Murphy DT, Wallace RJ Jr. Azithromycin activity against *Mycobacterium avium* complex lung disease in patients who were not infected with human immunodeficiency virus. *Clin Infect Dis* **1996**;23:983–9.
- Griffith DE, Brown BA, Murphy DT, Girard WM, Couch L, Wallace RJ Jr. Initial (6-month) results of three-times-weekly azithromycin in treatment regimens for *Mycobacterium avium* complex lung disease in human immunodeficiency virus–negative patients. *J Infect Dis* **1998**;178:121–6.
- Griffith DE, Brown BA, Girard WM, Griffith BE, Couch LA, Wallace RJ Jr. Azithromycin-containing regimens for treatment of *Mycobacterium avium* complex lung disease. *Clin Infect Dis* **2001**;32:1547–53.
- Mazurek GH, Hartman S, Zhang Y-S, et al. Large DNA restriction fragment polymorphism in the *Mycobacterium avium*–*M. intracellulare* complex: a potential epidemiologic tool. *J Clin Microbiol* **1993**;31:390–4.
- Zhang Y, Mazurek GH, Cave MD, et al. DNA polymorphisms in strains of *Mycobacterium tuberculosis* analyzed by pulsed-field gel electrophoresis: a tool for epidemiology. *J Clin Microbiol* **1992**;30:1551–6.
- Tenover FC, Arbeit RD, Goering RV, et al. Interpreting chromosomal DNA restriction patterns produced by pulsed-field gel electrophoresis: criteria for bacterial strain typing. *J Clin Microbiol* **1995**;33:2233–9.
- Yakrus MA, Reeves MW, Hunter SB. Characterization of isolates of *Mycobacterium avium* serotypes 4 and 8 from patients with AIDS by multilocus enzyme electrophoresis. *J Clin Microbiol* **1992**;30:1474–8.
- Wasem CF, McCarthy CM, Murray LW. Multilocus enzyme electrophoresis analysis of the *Mycobacterium avium* complex and other mycobacteria. *J Clin Microbiol* **1991**;29:264–71.
- Woods GL, Brown-Elliott BA, Desmond EP, et al. Susceptibility testing of mycobacteria, nocardia, and other aerobic actinomycetes: tentative standard. 2d ed. Wayne, PA: National Committee for Clinical Laboratory Standards, **2000**;20:M24–T2.
- Telenti A, Marchesi F, Balz M, Bally F, Böttger EC, Bodmer T. Rapid identification of mycobacteria to the species level by polymerase chain reaction and restriction enzyme analysis. *J Clin Microbiol* **1993**;31:175–8.
- Brown BA, Wallace RJ Jr, Onyi G. Activities of clarithromycin against eight slowly growing species of nontuberculous mycobacteria, determined by using a broth microdilution MIC system. *Antimicrob Agents Chemother* **1992**;36:1987–90.
- Picardeau M, Varnerot A, Lecompte T, Brel F, May T, Vincent V. Use of different molecular typing techniques for bacteriological follow-up in a clinical trial with AIDS patients with *Mycobacterium avium* bacteremia. *J Clin Microbiol* **1997**;35:2503–10.
- Zhang Y, Rajagopalan M, Brown BA, Wallace RJ Jr. Randomly amplified polymorphic DNA PCR for comparison of *Mycobacterium abscessus* strains from nosocomial outbreaks. *J Clin Microbiol* **1997**;35:3132–9.
- van Soolingen D, Bauer J, Ritacco V, et al. IS*1245* restriction fragment length polymorphism typing of *Mycobacterium avium* isolates: proposal for standardization. *J Clin Microbiol* **1998**;36:3051–4.
- Matsiota-Bernard P, Waser S, Tassios PT, Kyriakopoulos A, Legakis NJ. Rapid discrimination of *Mycobacterium avium* strains from AIDS patients by randomly amplified polymorphic DNA analysis. *J Clin Microbiol* **1997**;35:1585–8.
- Kauppinen J, Mäntytjärvi R, Katila M-L. Random amplified polymorphic DNA genotyping of *Mycobacterium mageritense*. *J Clin Microbiol* **1994**;32:1827–9.
